# Supplementary material for: Relationships between urbanization and CO2 emissions in China: An empirical analysis of population migration
Source: PLoS One. 2021 Aug 18;16(8):e0256335. doi: 10.1371/journal.pone.0256335 (PMC8372907; doi:10.1371/journal.pone.0256335)
Supplement: S1 Fig — (XLSX) [file pone.0256335.s003.xlsx]

## Sheet: scatter-co2
				co2pergdp
			0.232	0.352698
			0.233577	0.302785
			0.235108	0.173222
			0.238682	1.01686
			0.239568	0.864843
			0.239812	0.179175
			0.242927	0.827365
			0.244099	0.623943
			0.2443	0.350142
			0.24768	0.934966
			0.248659	0.314614
			0.249079	0.218072
			0.250174	0.532668
			0.252318	0.227082
			0.257984	0.352017
			0.260097	0.316689
			0.260863	0.485414
			0.262779	0.800638
			0.264257	0.275831
			0.265915	0.504826
			0.265973	0.364896
			0.266039	0.243908
			0.268365	0.845015
			0.27206	0.341716
			0.272429	0.464474
			0.276696	0.263299
			0.276862	0.270859
			0.279599	0.832367
			0.279993	0.458556
			0.280958	0.540528
			0.281019	0.206248
			0.281955	0.232242
			0.283078	0.205386
			0.284039	0.460507
			0.289081	0.358904
			0.289491	0.276268
			0.290509	0.215774
			0.291972	0.206229
			0.292508	0.729407
			0.294499	0.403966
			0.294856	0.462574
			0.302629	0.313244
			0.304085	0.260144
			0.305	0.392531
			0.305709	0.447389
			0.306183	0.355709
			0.307026	0.548807
			0.307768	0.45927
			0.308005	0.232209
			0.316	0.338764
			0.316098	0.295312
			0.317038	0.230266
			0.318102	0.398181
			0.319976	0.239013
			0.320956	0.555507
			0.320964	0.433589
			0.322028	0.243356
			0.322722	0.398975
			0.324455	0.374312
			0.3247	0.3439
			0.325614	1.63359
			0.329883	0.2501
			0.33	0.296585
			0.331219	0.335557
			0.333339	1.50674
			0.33499	0.23385
			0.335205	0.433165
			0.335837	0.223589
			0.33671	0.381292
			0.336782	0.306253
			0.337532	0.497968
			0.337577	0.524995
			0.338028	0.476218
			0.338436	0.476552
			0.338471	0.389006
			0.34	0.304698
			0.340221	0.257021
			0.341731	1.49204
			0.343	0.23803
			0.3434	0.312064
			0.343904	0.456471
			0.3464	0.20732
			0.347023	0.280602
			0.347273	0.473288
			0.347351	0.381074
			0.348908	0.33788
			0.349572	0.42655
			0.350825	1.39715
			0.351559	0.45116
			0.354575	0.31804
			0.354984	0.235428
			0.355766	0.248139
			0.355872	0.415423
			0.356	0.217342
			0.357026	0.375213
			0.358349	0.403864
			0.358885	1.65149
			0.3603	0.268754
			0.361328	0.296478
			0.3624	0.191307
			0.363289	0.502805
			0.3641	0.388885
			0.365933	0.388071
			0.367984	0.237331
			0.369362	1.4277
			0.369586	0.287338
			0.369627	0.233914
			0.371	0.296545
			0.371159	0.441838
			0.371528	0.281167
			0.374	0.204501
			0.374026	0.344554
			0.375068	0.342121
			0.376484	0.460068
			0.376587	0.415687
			0.377042	0.254184
			0.3794	0.422007
			0.380874	1.47783
			0.381484	0.243909
			0.3816	0.155472
			0.381648	0.462606
			0.3844	0.378335
			0.384991	0.40171
			0.385008	0.232116
			0.386811	0.212744
			0.387	0.272232
			0.387	0.207281
			0.3871	0.26635
			0.3875	0.26141
			0.388141	1.36485
			0.3915	0.398367
			0.392	0.276545
			0.392	0.155911
			0.392081	0.365251
			0.3926	0.376552
			0.3931	0.210961
			0.395007	0.346671
			0.396312	1.19634
			0.396363	0.361772
			0.398	0.195428
			0.398432	0.416995
			0.399119	0.337072
			0.4	0.150024
			0.4007	0.341745
			0.40174	0.173185
			0.402564	0.363391
			0.403	0.277282
			0.4045	0.237419
			0.404711	0.319539
			0.405	0.261133
			0.4057	0.217888
			0.405799	1.2045
			0.408006	0.348687
			0.409747	0.338111
			0.410582	0.311159
			0.4136	0.166117
			0.413999	0.345583
			0.415014	0.241856
			0.418	0.278993
			0.418	0.139149
			0.4183	0.1438
			0.418312	0.313232
			0.418989	0.30803
			0.419033	0.263745
			0.419941	0.203582
			0.42	0.346354
			0.420703	1.15786
			0.421	0.254934
			0.4215	0.190449
			0.422049	0.829245
			0.422819	1.08315
			0.4243	0.181647
			0.425764	0.222519
			0.425982	0.283307
			0.425992	0.323187
			0.427576	0.199808
			0.43	0.982886
			0.430024	0.30881
			0.430082	0.219506
			0.4301	1.10976
			0.430206	0.357966
			0.431699	0.33369
			0.431815	0.152994
			0.432	0.17966
			0.433029	0.155079
			0.434733	0.721439
			0.435	0.269834
			0.435167	0.254796
			0.4353	0.131213
			0.4353	0.131419
			0.435343	0.350073
			0.438	0.294339
			0.439555	0.696384
			0.4398	0.372182
			0.4402	0.910843
			0.440252	0.266678
			0.4403	0.926597
			0.44061	0.147341
			0.441907	0.244414
			0.443	0.266968
			0.444954	0.275287
			0.445489	0.212836
			0.446186	0.685259
			0.447602	0.246195
			0.448	0.193894
			0.449838	0.730068
			0.45	0.313431
			0.450973	0.144125
			0.451048	0.755867
			0.451075	0.17698
			0.451751	0.225874
			0.452	0.220058
			0.456014	0.256735
			0.456559	0.183676
			0.456958	0.749111
			0.457045	0.131306
			0.457564	0.260058
			0.459948	0.740722
			0.46	0.208036
			0.4608	0.716132
			0.461	0.297534
			0.461	0.172268
			0.462338	0.255508
			0.463735	0.164654
			0.464427	0.205745
			0.465	0.179899
			0.4665	0.121489
			0.467	0.224727
			0.468	0.242038
			0.468	0.275255
			0.468664	0.717365
			0.472	0.170093
			0.472949	0.237192
			0.4744	0.266943
			0.4751	0.117903
			0.476	0.245915
			0.476004	0.206552
			0.476339	0.166747
			0.478673	0.691445
			0.48	0.164377
			0.480414	0.635884
			0.482775	0.663049
			0.483	0.231421
			0.4834	0.206676
			0.486992	0.212788
			0.490741	0.160264
			0.493147	0.206545
			0.494237	0.182472
			0.496545	0.586135
			0.49667	0.21713
			0.4968	0.581128
			0.497032	0.193863
			0.497653	0.751114
			0.497956	0.46577
			0.498274	0.147532
			0.499627	0.514224
			0.4999	0.208923
			0.5002	0.238323
			0.504045	0.172478
			0.505196	0.139241
			0.505585	0.204162
			0.5067	0.691743
			0.508892	0.439878
			0.509	0.19661
			0.510695	0.531607
			0.511814	0.192937
			0.5126	0.556906
			0.513843	0.160027
			0.514083	0.190129
			0.5159	0.200721
			0.516	0.140181
			0.51764	0.437263
			0.518255	0.181812
			0.519412	0.473508
			0.519792	0.174722
			0.522887	0.401392
			0.523799	0.432084
			0.5243	0.184696
			0.525037	0.428264
			0.525249	0.174445
			0.525702	0.404498
			0.525898	0.412254
			0.526194	0.503723
			0.526676	0.178996
			0.527771	0.412725
			0.5297	0.405001
			0.529983	0.184896
			0.530091	0.144154
			0.530722	0.382616
			0.5316	0.348236
			0.5321	0.287099
			0.533112	0.260501
			0.533309	0.246729
			0.53408	0.229885
			0.535	0.359923
			0.535	0.162688
			0.537	0.202819
			0.537075	0.152937
			0.539	0.336955
			0.548351	0.203524
			0.549118	0.448888
			0.549389	0.179471
			0.549474	0.480649
			0.549949	0.141125
			0.549988	0.406873
			0.5502	0.165811
			0.550736	0.137671
			0.554056	0.310875
			0.554752	0.174069
			0.555	0.310031
			0.555016	0.469465
			0.556744	0.28215
			0.559995	0.418065
			0.56	0.402055
			0.56007	0.172285
			0.561459	0.164072
			0.565	0.253058
			0.565833	0.144788
			0.566134	0.484485
			0.568465	0.140519
			0.569	0.246178
			0.5698	0.140405
			0.57108	0.126159
			0.571722	0.167425
			0.5774	0.458994
			0.581	0.126387
			0.583295	0.164365
			0.586828	0.391583
			0.5899	0.369245
			0.592	0.324837
			0.594777	0.155195
			0.596	0.110992
			0.600441	0.255017
			0.600458	0.27104
			0.603208	0.111966
			0.605795	0.12669
			0.606156	0.150928
			0.611345	0.115634
			0.616119	0.124336
			0.617609	0.129297
			0.618984	0.123418
			0.620792	0.140275
			0.621028	0.237043
			0.623	0.113965
			0.63	0.116806
			0.632	0.104726
			0.6405	0.216547
			0.6565	0.204397
			0.661814	0.105123
			0.66499	0.0994112
			0.674	0.090249
			0.724106	0.404329
			0.729579	0.366743
			0.734983	0.354236
			0.740318	0.301426
			0.745583	0.288133
			0.750777	0.247008
			0.7573	0.215276
			0.7631	0.190378
			0.770138	0.132246
			0.7723	0.155377
			0.77522	0.302937
			0.780202	0.1454
			0.78065	0.204613
			0.781493	0.140608
			0.785664	0.182188
			0.790728	0.159947
			0.791175	0.271206
			0.795177	0.141208
			0.795997	0.145502
			0.798472	0.154862
			0.803357	0.24615
			0.805	0.133107
			0.8155	0.120793
			0.816112	0.237583
			0.819707	0.175098
			0.829558	0.220999
			0.83485	0.141277
			0.838095	0.18556
			0.8433	0.126806
			0.845	0.108307
			0.849	0.0958848
			0.85	0.088336
			0.859327	0.0779519
			0.861035	0.19968
			0.861829	0.0660008
			0.862	0.0611346
			0.892749	0.123212
			0.893	0.10962
			0.893175	0.116708
