# Supplementary material for: Relationships between urbanization and CO2 emissions in China: An empirical analysis of population migration
Source: PLoS One. 2021 Aug 18;16(8):e0256335. doi: 10.1371/journal.pone.0256335 (PMC8372907; doi:10.1371/journal.pone.0256335)
Supplement: S2 Fig — (XLS) [file pone.0256335.s004.xls]

## Sheet: Fig.2
					Proportion of temporary population			Urbanization rate of resident population	Proportion of temporary population											id	region	Urbanization rate of resident population	proportion of temporary population
			Beijing	0.862	0.240909			0.862	0.240909											11	Zhejiang	0.632	0.270107
			Tianjin	0.8155	0.149042			0.8155	0.149042											1	Beijing	0.862	0.240909
			Hebei	0.468	0.018534			0.468	0.018534											9	Shanghai	0.893	0.238624
			Shanxi	0.5126	0.03279			0.5126	0.03279											19	Guangdong	0.674	0.194556
			Inner Mongoria	0.5774	0.063347			0.5774	0.063347											13	Fujian	0.596	0.185257
			Liaoning	0.6565	0.038205			0.6565	0.038205											2	Tianjin	0.8155	0.149042
			Jilin	0.537	0.026297			0.537	0.026297											22	Chongqing	0.5698	0.145444
			Heilongjiang	0.569	0.018312			0.569	0.018312											10	Jiangsu	0.63	0.132004
			Shanghai	0.893	0.238624			0.893	0.238624											30	Xinjiang	0.4398	0.090512
			Jiangsu	0.63	0.132004			0.63	0.132004											28	Qinghai	0.4744	0.07596
			Zhejiang	0.632	0.270107			0.632	0.270107											5	Inner Mongoria	0.5774	0.063347
			Anhui	0.465	0.031409			0.465	0.031409											21	Hainan	0.516	0.056304
			Fujian	0.596	0.185257			0.596	0.185257											15	Shandong	0.5243	0.049646
			Jiangxi	0.4751	0.013791			0.4751	0.013791											25	Yunnan	0.3931	0.046201
			Shandong	0.5243	0.049646			0.5243	0.049646											24	Guizhou	0.3641	0.042085
			Henan	0.4243	0.038677			0.4243	0.038677											26	Shannxi	0.5002	0.041719
			Hubei	0.535	0.041387			0.535	0.041387											17	Hubei	0.535	0.041387
			Hunan	0.4665	0.028197			0.4665	0.028197											27	Gansu	0.3875	0.039293
			Guangdong	0.674	0.194556			0.674	0.194556											16	Henan	0.4243	0.038677
			Guangxi	0.4353	0.025573			0.4353	0.025573											6	Liaoning	0.6565	0.038205
			Hainan	0.516	0.056304			0.516	0.056304											4	Shanxi	0.5126	0.03279
			Chongqing	0.5698	0.145444			0.5698	0.145444											12	Anhui	0.465	0.031409
			Sichuan	0.4353	0.024918			0.4353	0.024918											18	Hunan	0.4665	0.028197
			Guizhou	0.3641	0.042085			0.3641	0.042085											29	Ningxia	0.5067	0.026761
			Yunnan	0.3931	0.046201			0.3931	0.046201											7	Jilin	0.537	0.026297
			Shannxi	0.5002	0.041719			0.5002	0.041719											20	Guangxi	0.4353	0.025573
			Gansu	0.3875	0.039293			0.3875	0.039293											23	Sichuan	0.4353	0.024918
			Qinghai	0.4744	0.07596			0.4744	0.07596											3	Hebei	0.468	0.018534
			Ningxia	0.5067	0.026761			0.5067	0.026761											8	Heilongjiang	0.569	0.018312
			Xinjiang	0.4398	0.090512			0.4398	0.090512											14	Jiangxi	0.4751	0.013791
					id	year	resident	household	rateoftemporarypopulation
					11	2012	0.632	0.317	0.270107		浙江
					1	2012	0.862	0.8013	0.240909		北京
					9	2012	0.893	0.8976	0.238624		上海
					19	2012	0.674	0.5217	0.194556		广东
					13	2012	0.596	0.3411	0.185257		福建
					2	2012	0.8155	0.6214	0.149042		天津
					22	2012	0.5698	0.394	0.145444		重庆
					10	2012	0.63	0.5599	0.132004		江苏
					30	2012	0.4398	0.4277	0.090512		新疆
					28	2012	0.4744	0.36	0.07596		青海
					5	2012	0.5774	0.4118	0.063347		内蒙古
			.		21	2012	0.516	0.3795	0.056304		海南
					15	2012	0.5243	0.4197	0.049646		山东
					25	2012	0.3931	0.2276	0.046201		云南
					24	2012	0.3641	0.1658	0.042085		贵州
					26	2012	0.5002	0.3709	0.041719		陕西
					17	2012	0.535	0.3456	0.041387		湖北
					27	2012	0.3875	0.2738	0.039293		甘肃
					16	2012	0.4243	0.2227	0.038677		河南
					6	2012	0.6565	0.5145	0.038205		辽宁
					4	2012	0.5126	0.3348	0.03279		山西
					12	2012	0.465	0.2285	0.031409		安徽
					18	2012	0.4665	0.2229	0.028197		湖南
					29	2012	0.5067	0.3942	0.026761		宁夏
					7	2012	0.537	0.4689	0.026297		吉林
					20	2012	0.4353	0.1918	0.025573		广西
					23	2012	0.4353	0.2814	0.024918		四川
					3	2012	0.468	0.3204	0.018534		河北
					8	2012	0.569	0.4878	0.018312		黑龙江
					14	2012	0.4751	0.2667	0.013791		江西
