# Supplementary material for: Relationships between urbanization and CO2 emissions in China: An empirical analysis of population migration
Source: PLoS One. 2021 Aug 18;16(8):e0256335. doi: 10.1371/journal.pone.0256335 (PMC8372907; doi:10.1371/journal.pone.0256335)
Supplement: S2 File — (DO) [file pone.0256335.s002.do]

use "data.dta", clear

xtset id year

///table 1 Descriptive statistics for all variables.
gen resident100= resident*100
gen household100= household*100
gen fdi100= fdi*100
gen rateoftemporarypopulation100= rateoftemporarypopulation*100
sum resident100 household100 fdi100 rateoftemporarypopulation100, d
sum resident100 household100 fdi100 rateoftemporarypopulation100,
centile resident100 household100 fdi100 rateoftemporarypopulation100
centile regulation
sum structure, d
gen structure100= structure *100
sum structure100, d
sum develzone2, d


///table 2 Urbanization and CO2 emissions: FE estimators, DK estimators and 2SLS estimators.


xtreg     lnco2percapita2    lnresident2    lndensity2    lngdpper    structure1 lnfdi   lnregulation   lnconsumption  i.year,fe
xtreg     lnco2percapita2    lnhousehold2   lndensity2    lngdpper    structure1 lnfdi   lnregulation   lnconsumption  i.year,fe


h  xtscc
xtscc     lnco2percapita2    lnresident2    lndensity2    lngdpper    structure1 lnfdi   lnregulation   lnconsumption ,fe
xtscc     lnco2percapita2    lnhousehold   lndensity2    lngdpper    structure1 lnfdi   lnregulation   lnconsumption ,fe

xtreg     lnco2percapita2    lnhousehold2   lndensity2    lngdpper    structure1 lnfdi   lnregulation   lnconsumption  i.year ,fe 

xtset id year

///columns (A) and (B) of table 2 with the time-fixed effects and region-fixed effects
xtreg     lnco2percapita2    lnresident2    lndensity2    lngdpper    structure1 lnfdi   lnregulation   lnconsumption i.year ,fe 
 
xtreg     lnco2percapita2    household   lndensity2    lngdpper    structure1 lnfdi   lnregulation   lnconsumption i.year ,fe 

///columns (C) and (D) of table 2
h  xtscc
xtscc     lnco2percapita2    lnresident2    lndensity2    lngdpper    structure1 lnfdi   lnregulation   lnconsumption ,fe
xtscc     lnco2percapita2    lnhousehold   lndensity2    lngdpper    structure1 lnfdi   lnregulation   lnconsumption ,fe


///hausman test_Hausman test statistics_columns (A) and (B) of table 2
qui xtreg     lnco2percapita2    lnresident2    lndensity2    lngdpper    structure1 lnfdi   lnregulation   lnconsumption i.year ,fe 
est store FE
qui xtreg     lnco2percapita2    lnresident2    lndensity2    lngdpper    structure1 lnfdi   lnregulation   lnconsumption i.year ,re
est store RE
hausman FE RE, sig

qui xtreg     lnco2percapita2    household   lndensity2    lngdpper    structure1 lnfdi   lnregulation   lnconsumption i.year ,fe 
est store FE
qui xtreg     lnco2percapita2    household   lndensity2    lngdpper    structure1 lnfdi   lnregulation   lnconsumption i.year ,re
est store RE
hausman FE RE, sig

///merge ivdata
merge 1:1  year  id using "E:\360MoveData\Users\Lenovo\Desktop\ivdata.dta"
drop _merge

///2sls solve endogenous problem

label variable develzone1 "National economic and Technological Development Zone"
label variable develzone2 "National high tech Industrial Development Zone"


sum develzone2


///columns (E) of table 2_2sls
xtivreg    lnco2percapita2  lndensity2    gdpper    structure1 lnfdi   lnregulation ///
  lnconsumption   year1 ( lnresident2=   develzone2 rail1937 populdensity1990) 
xtoverid    
  
///columns (F) of table 2_2sls
xtivreg    lnco2percapita2  lndensity2    lngdpper    structure1 lnfdi   lnregulation ///
  lnconsumption   year1 (lnhousehold2= rail rail1937  develzone2 )  
xtoverid  


///table 3 Urbanization and CO2 emissions: first-differenced GMM estimators and system GMM estimators.
xtabond    lnco2percapita2   lnresident2    lndensity2      lngdpper      structure1 lnfdi   lnregulation  ///
lnconsumption, lags(1) maxldep(1) vce(robust) artests(2)   twostep
xtabond    lnco2percapita2   lnhousehold2    lndensity2      lngdpper      structure1 lnfdi   lnregulation  ///
lnconsumption, lags(1) maxldep(1) vce(robust) artests(2)   twostep
xtdpdsys      lnco2percapita2   lnresident2    lndensity2      lngdpper      structure1 lnfdi   lnregulation  ///
lnconsumption, lags(1) maxldep(1) vce(robust) artests(2)   twostep
estat abond
xtdpdsys      lnco2percapita2   lnresident2    lndensity2      lngdpper      structure1 lnfdi   lnregulation  ///
lnconsumption, lags(1) maxldep(1)  artests(2)   twostep
estat sargan
xtdpdsys      lnco2percapita2   lnhousehold2    lndensity2      lngdpper      structure1 lnfdi   lnregulation  ///
lnconsumption, lags(1) maxldep(1) vce(robust) artests(2)   twostep
estat abond
xtdpdsys      lnco2percapita2   lnhousehold2    lndensity2      lngdpper      structure1 lnfdi   lnregulation  ///
lnconsumption, lags(1) maxldep(1) artests(2)   twostep
estat sargan

///table 4 Threshold regression estimation results.
h xthreg
xthreg lnco2percapita2   lndensity2    lngdpper    structure1     , rx(  lnresident2 ) ///
qx( rateoftemporarypopulation ) thnum(1) grid(300) trim(0.01) bs(300)  vce(robust) 
xthreg lnco2percapita2   lndensity2    lngdpper    structure1     , rx(  lnresident2 ) ///
qx( rateoftemporarypopulation ) thnum(2) grid(300) trim(0.01 0.01) bs(300 300)  vce(robust) 
xthreg lnco2percapita2   lndensity2    lngdpper    structure1    fdi   regulation consumption  , rx(  lnresident2 ) ///
qx( rateoftemporarypopulation ) thnum(1) grid(300) trim(0.01) bs(300)  vce(robust)  

xthreg lnco2percapita2   lndensity2    lngdpper    structure1    , rx(  lnresident2 ) ///
qx( rateoftemporarypopulation ) thnum(2) grid(300) trim(0.01 0.01) bs(300 300)  vce(robust)


xthreg lnco2percapita2   lndensity2    lngdpper    structure1, rx(  lnhousehold2 ) ///
qx( rateoftemporarypopulation ) thnum(1) grid(300) trim(0.01) bs(300)  vce(robust)
xthreg lnco2percapita2   lndensity2    lngdpper    structure1, rx(  lnhousehold2 ) ///
qx( rateoftemporarypopulation ) thnum(2) grid(300) trim(0.01 0.01) bs(300 300)  vce(robust) 
xthreg lnco2percapita2   lndensity2    lngdpper    structure1   fdi   regulation consumption, rx(  lnhousehold2 ) ///
qx( rateoftemporarypopulation ) thnum(1) grid(300) trim(0.01) bs(300)  vce(robust)

xthreg lnco2percapita2   lndensity2    lngdpper    structure1    , rx(  lnhousehold2 ) ///
qx( rateoftemporarypopulation ) thnum(2) grid(300) trim(0.01 0.01) bs(300 300)  vce(robust)
